# Supplementary material
Source: PubMed Central journal article supplement (PMC7003462)
Supplement: rspb20191917supp2.pdf [file rspb20191917supp2.pdf]

**Supplemental Table S1.** Telomere length (average of each sample) in relation to the covariates Age (days), mass (g) and Hatch Order (1,2,3) and the factors Sex (Male) (male and female) and Treatment (Control or Vitamins; note that day 1 measurements are coded as control for all nestlings). Factors in the final model have been highlighted in **bold**. Significant factors ( $p < 0.05$ ) have an \*. Random terms are included in all models, and their values are in *italic*. Non-significant interactions were excluded from the models when estimating coefficients of main effects.

| Percentile 10               |             |                       |                      |                   |                     |              |
|-----------------------------|-------------|-----------------------|----------------------|-------------------|---------------------|--------------|
| Fixed terms                 |             |                       |                      |                   | Random terms        |              |
| Terms                       | Intercept   | Estimate (S.E.)       | F (d.f)              | p                 | Terms               | Variance     |
| <b>Age</b>                  | <b>6121</b> | <b>-8.026 (1.148)</b> | <b>48.91 (78.07)</b> | <b>&lt;0.001*</b> | <i>Chick / Nest</i> | <i>76148</i> |
| <b>Treatment (Vitamins)</b> |             | <b>78.03 (30.11)</b>  | <b>6.714 (87.62)</b> | <b>0.011*</b>     | <i>Nest</i>         | <i>45756</i> |
| Rejected: Hatch order       | 6229        | -60.54 (59.94)        | 1.02 (34.12)         | 0.32              | <i>Gel</i>          | <i>66411</i> |
| Rejected: Sex (Male)        | 6265        | -74.6 (93.68)         | 0.634 (42.04)        | 0.43              | <i>Residual</i>     | <i>6675</i>  |
| Rejected: Mass              | 6269        | -0.014 (0.035)        | 0.162 (77.43)        | 0.688             |                     |              |
| Rejected: Age:Sex (Male)    | 6242        | -1.901 (1.918)        | 0.982 (73.65)        | 0.325             |                     |              |
| Rejected: Age:Mass          | 6212        | -0.001 (0.002)        | 0.127 (73.67)        | 0.722             |                     |              |
| Rejected: Age:Hatch order   | 6161        | 0.667 (1.607)         | 0.172 (76.09)        | 0.679             |                     |              |
| Rejected: Age:Treatment     | 6147        | 1391 (3972)           | 0.123 (70.56)        | 0.727             |                     |              |

| Percentile 20                      |             |                      |                     |                   |                     |              |
|------------------------------------|-------------|----------------------|---------------------|-------------------|---------------------|--------------|
| Fixed terms                        |             |                      |                     |                   | Random terms        |              |
| Terms                              | Intercept   | Estimate (S.E.)      | F (d.f)             | p                 | Terms               | Variance     |
| <b>Age</b>                         | <b>6908</b> | <b>-7.735 (1.04)</b> | <b>55.34 (77.9)</b> | <b>&lt;0.001*</b> | <i>Chick / Nest</i> | <i>93020</i> |
| <b>Treatment (Vitamins)</b>        |             | <b>70.88 (27.53)</b> | <b>6.629 (84.6)</b> | <b>0.012*</b>     | <i>Nest</i>         | <i>57931</i> |
| Rejected: Hatch order              | 7017        | -60.93 (65.71)       | 0.86 (35.61)        | 0.36              | <i>Gel</i>          | <i>60908</i> |
| Rejected: Sex (Male) (Male)        | 7059        | -89.03 (102)         | 0.755 (44.11)       | 0.390             | <i>Residual</i>     | <i>5415</i>  |
| Rejected: Mass                     | 7060        | -0.005 (0.03)        | 0.027 (77.23)       | 0.87              |                     |              |
| Rejected: Age:Mass                 | 6994        | -0.001 (0.001)       | 0.738 (74.99)       | 0.393             |                     |              |
| Rejected: Age:Sex (Male) (Males)   | 6996        | -0.855 (1.908)       | 0.2 (73.53)         | 0.656             |                     |              |
| Rejected: Age:Hatch order          | 6947        | 0.642 (1.463)        | 0.192 (76.36)       | 0.662             |                     |              |
| Rejected: Age:Treatment (Vitamins) | 6943        | 0.351 (3.607)        | 0.01 (71.36)        | 0.923             |                     |              |

| Percentile 30             |           |                 |               |         |              |          |
|---------------------------|-----------|-----------------|---------------|---------|--------------|----------|
| Fixed terms               |           |                 |               |         | Random terms |          |
| Terms                     | Intercept | Estimate (S.E.) | F (d.f)       | p       | Terms        | Variance |
| Age                       | 7622      | -8.023 (1.172)  | 46.83 (78.37) | <0.001* | Chick / Nest | 111046   |
|                           |           |                 |               |         | Nest         | 79409    |
| Treatment                 |           | 74.7 (31.01)    | 5.804 (85.38) | 0.018*  | Gel          | 76908    |
|                           |           |                 |               |         | Residual     | 6892     |
| Rejected: Sex (Male)      | 7666      | -103 (112)      | 0.849 (44.75) | 0.362   |              |          |
| Rejected: Hatch order     | 7771      | -58.32 (71.7)   | 0.662 (33.17) | 0.422   |              |          |
| Rejected: Mass            | 7769      | 0.008 (0.036)   | 0.051 (77.59) | 0.821   |              |          |
| Rejected: Age:Mass        | 7684      | -0.001 (0.001)  | 0.956 (75.27) | 0.331   |              |          |
| Rejected: Age:Hatch order | 7617      | -0.869 (1.639)  | 0.281 (77.82) | 0.597   |              |          |
| Rejected: Age:Treatment   | 7630      | -1.35 (4.043)   | 0.112 (72.79) | 0.739   |              |          |
| Rejected: Age:Sex (Male)  | 7629      | -0.118 (2.184)  | 0.003 (71.87) | 0.957   |              |          |

| Percentile 40             |           |                 |               |         |              |          |
|---------------------------|-----------|-----------------|---------------|---------|--------------|----------|
| Fixed terms               |           |                 |               |         | Random terms |          |
| Terms                     | Intercept | Estimate (S.E.) | F (d.f)       | p       | Terms        | Variance |
| Age                       | 8420      | -8.473 (1.506)  | 31.64 (79.24) | <0.001* | Chick / Nest | 141293   |
|                           |           |                 |               |         | Nest         | 115654   |
| Treatment                 |           | 78.22 (39.62)   | 3.897 (87.93) | 0.051   | Gel          | 130402   |
|                           |           |                 |               |         | Residual     | 11457    |
| Rejected:Sex (Male)       | 8474      | -129 (129)      | 1 (43.39)     | 0.323   |              |          |
| Rejected:Hatch order      | 8608      | -73.28 (81.34)  | 0.812 (32.29) | 0.374   |              |          |
| Rejected:Mass             | 8602      | 0.019 (0.047)   | 0.174 (78.38) | 0.677   |              |          |
| Rejected: Age:Treatment   | 8597      | -4.386 (4.567)  | 0.923 (75.66) | 0.34    |              |          |
| Rejected: Age:Hatch order | 8526      | -1.227 (2.012)  | 0.372 (77.52) | 0.544   |              |          |
| Rejected: Age:Mass        | 8436      | -0.001 (0.002)  | 0.291 (73.68) | 0.591   |              |          |
| Rejected: Age:Sex (Male)  | 8435      | 0.739 (2.803)   | 0.069 (72.22) | 0.793   |              |          |

| Percentile 50        |           |                 |               |         |              |          |
|----------------------|-----------|-----------------|---------------|---------|--------------|----------|
| Fixed terms          |           |                 |               |         | Random terms |          |
| Terms                | Intercept | Estimate (S.E.) | F (d.f)       | p       | Terms        | Variance |
| Age                  | 9373      | -8.906 (1.983)  | 20.18 (80.51) | <0.001* | Chick / Nest | 185604   |
| Treatment            |           | 79.62 (51.78)   | 2.364 (91.38) | 0.128   | Nest         | 169804   |
| Rejected:Hatch order | 9546      | -96.78 (94.96)  | 1.039 (33.67) | 0.315   | Gel          | 240977   |
| Rejected:Sex (Male)  | 9623      | -159.9 (151.4)  | 1.115 (41.42) | 0.297   | Residual     | 20044    |
| Rejected:Mass        | 9612      | 0.034 (0.061)   | 0.314 (79.71) | 0.577   |              |          |
| Rejected:Treatment   | 9604      | -7.946 (5.989)  | 1.76 (76.33)  | 0.189   |              |          |
| Rejected:Hatch order | 9482      | -2.078 (2.626)  | 0.626 (78.26) | 0.431   |              |          |
| Rejected:Sex (Male)  | 9511      | 1.431 (3.453)   | 0.172 (73.51) | 0.68    |              |          |
| Rejected:Mass        | 9430      | -0.001 (0.003)  | 0.149 (73.53) | 0.7     |              |          |

| Percentile 60            |           |                 |               |         |              |          |
|--------------------------|-----------|-----------------|---------------|---------|--------------|----------|
| Fixed terms              |           |                 |               |         | Random terms |          |
| Terms                    | Intercept | Estimate (S.E.) | F (d.f)       | P       | Terms        | Variance |
| Age                      | 10515     | -9.060 (2.646)  | 11.72 (82.14) | <0.001* | Chick / Nest | 265472   |
| Treatment                |           | 66.43 (68.6)    | 0.938 (95.11) | 0.335   | Nest         | 231185   |
| Rejected:Hatch order     | 10741     | -126.7 (114.1)  | 1.232 (33.63) | 0.275   | Gel          | 424537   |
| Rejected:Sex (Male)      | 10808     | -138.4 (183.5)  | 0.569 (41.84) | 0.455   | Residual     | 36055    |
| Rejected:Mass            | 10790     | 0.052 (0.082)   | 0.404 (81.74) | 0.527   |              |          |
| Rejected:Age:Treatment   | 10780     | -0.116 (7.977)  | 2.125 (77.67) | 0.149   |              |          |
| Rejected:Age:Hatch order | 10590     | -3.323 (3.482)  | 0.911 (79.53) | 0.343   |              |          |
| Rejected:Age:Sex (Male)  | 10658     | 3.612 (4.577)   | 0.623 (74.78) | 0.433   |              |          |
| Rejected:Age:Mass        | 10550     | -0.002 (0.004)  | 0.143 (74.92) | 0.707   |              |          |

| Percentile 70             |           |                 |               |        |              |          |
|---------------------------|-----------|-----------------|---------------|--------|--------------|----------|
| Fixed terms               |           |                 |               |        | Random terms |          |
| Terms                     | Intercept | Estimate (S.E.) | F (d.f)       | P      | Terms        | Variance |
| Age                       | 11929     | -10.04 (3.575)  | 7.888 (83.76) | 0.007* | Chick / Nest | 427914   |
| Treatment                 |           | 104.8 (92.2)    | 1.292 (97.98) | 0.259  | Nest         | 304942   |
| Rejected:Hatch order      | 12202     | -152.7 (145.1)  | 1.107 (34.28) | 0.3    | Gel          | 744645   |
| Rejected: Mass            | 12170     | 0.078 (0.11)    | 0.503 (84.59) | 0.48   | Residual     | 66301    |
| Rejected: Sex (Male)      | 12210     | -77.04 (233)    | 0.109 (43.9)  | 0.743  |              |          |
| Rejected: Age:Treatment   | 12190     | -17.14 (10.73)  | 2.551 (79.16) | 0.114  |              |          |
| Rejected: Age:Sex (Male)  | 12310     | 8.038 (6.078)   | 1.749 (77.17) | 0.19   |              |          |
| Rejected: Age:Hatch order | 12060     | -4.109 (4.713)  | 0.76 (79.98)  | 0.386  |              |          |
| Rejected: Age:Mass        | 11820     | -0.003 (0.005)  | 0.426 (76.58) | 0.516  |              |          |

| Percentile 80             |              |                       |                      |               |                     |                |
|---------------------------|--------------|-----------------------|----------------------|---------------|---------------------|----------------|
| Fixed terms               |              |                       |                      |               | Random terms        |                |
| Terms                     | Intercept    | Estimate (S.E.)       | F (d.f)              | P             | Terms               | Variance       |
| <b>Age</b>                | <b>13824</b> | <b>-10.72 (5.045)</b> | <b>4.516 (82.92)</b> | <b>0.037*</b> | <i>Chick / Nest</i> | <i>953071</i>  |
| <b>Treatment</b>          |              | <b>120.7 (130.5)</b>  | <b>0.855 (96.15)</b> | <b>0.357</b>  | <i>Nest</i>         | <i>371546</i>  |
| Rejected:Hatch order      | 14245        | -234.7 (212.3)        | 1.222 (35.56)        | 0.276         | <i>Gel</i>          | <i>1433344</i> |
| Rejected:Mass             | 14210        | 0.094 (0.154)         | 0.374 (84.51)        | 0.542         | <i>Residual</i>     | <i>131713</i>  |
| Rejected:Sex (Male)       | 14210        | -2.335 (332.7)        | 0 (46.84)            | 0.994         |                     |                |
| Rejected: Age:Treatment   | 14190        | -24.35 (15.09)        | 2.605 (78.67)        | 0.111         |                     |                |
| Rejected: Age:Sex (Male)  | 14380        | 13.69 (8.524)         | 2.578 (76.69)        | 0.112         |                     |                |
| Rejected: Age:Hatch order | 14050        | -5.358 (6.622)        | 0.655 (79.33)        | 0.421         |                     |                |
| Rejected: Age:Mass        | 13710        | -0.005 (0.007)        | 0.426 (76.33)        | 0.516         |                     |                |

| Percentile 90             |              |                       |                      |              |                     |                |
|---------------------------|--------------|-----------------------|----------------------|--------------|---------------------|----------------|
| Fixed terms               |              |                       |                      |              | Random terms        |                |
| Terms                     | Intercept    | Estimate (S.E.)       | F (d.f)              | P            | Terms               | Variance       |
| <b>Age</b>                | <b>17092</b> | <b>-15.61 (8.318)</b> | <b>3.522 (73.48)</b> | <b>0.065</b> | <i>Chick / Nest</i> | <i>4678974</i> |
| <b>Treatment</b>          |              | <b>255.9 (218.8)</b>  | <b>1.065 (82.04)</b> | <b>0.305</b> | <i>Nest</i>         | <i>451097</i>  |
| Rejected: Hatch order     | 18281        | -659 (449)            | 2.153 (33.93)        | 0.152        | <i>Gel</i>          | <i>6731578</i> |
| Rejected: Mass            | 18250        | 0.0985 (0.254)        | 0.151 (75.91)        | 0.699        | <i>Residual</i>     | <i>350493</i>  |
| Rejected: Sex (Male)      | 18328        | -149.8 (670.2)        | 0.05 (44.07)         | 0.824        |                     |                |
| Rejected: Age:Sex (Male)  | 18600        | 19.35 (13.89)         | 1.942 (69.99)        | 0.168        |                     |                |
| Rejected: Age:Treatment   | 18604        | -25.38 (25.61)        | 0.982 (69.48)        | 0.325        |                     |                |
| Rejected: Age:Hatch order | 18187        | -6.816 (11.11)        | 0.376 (71)           | 0.542        |                     |                |
| Rejected: Age:Mass        | 18090        | -0.001 (0.012)        | 0.012 (68.34)        | 0.913        |                     |                |
