# Supplementary material
Source: PubMed Central journal article supplement (PMC7003462)
Supplement: rspb20191917supp4.pdf [file rspb20191917supp4.pdf]

**Supplemental Table S3.** Telomere length at the 10<sup>th</sup>, 20<sup>th</sup>, etc. to 90<sup>th</sup> percentile in relation to Age (days) and its interaction. Factors in the final model have been highlighted in **bold**. Significant factors ( $p < 0.05$ ) have an \*. Random terms are included in all models, and their values are in *italic*. Non-significant interactions were excluded from the models when estimating coefficients of main effects.

|                   | Fixed terms        |             |                     |                     |                   | Random terms                    |               |
|-------------------|--------------------|-------------|---------------------|---------------------|-------------------|---------------------------------|---------------|
|                   | Terms              | Intercept   | Estimate (S.E.)     | F (d.f)             | p                 | Terms                           | Variance      |
| Percentiles model | <b>Percentiles</b> | <b>4092</b> | <b>121 (1.21)</b>   | <b>10035 (1152)</b> | <b>&lt;0.001*</b> | <i>Sample ID / Chick / Nest</i> | <i>0</i>      |
|                   | <b>Age</b>         | <b>4092</b> | <b>-7.15 (3.96)</b> | <b>3.27 (1209)</b>  | <b>0.071</b>      | <i>Chick / Nest</i>             | <i>270754</i> |
|                   |                    |             |                     |                     |                   | <i>Nest</i>                     | <i>195406</i> |
|                   | Percentiles:Age    | 3780        | -0.19 (0.13)        | 2.09 (1151)         | 0.15              | <i>Gel</i>                      | <i>425398</i> |
| <i>Residual</i>   |                    |             |                     |                     |                   | <i>1185284</i>                  |               |
