# Supplementary material
Source: PubMed Central journal article supplement (PMC7003462)
Supplement: rspb20191917supp5.pdf [file rspb20191917supp5.pdf]

**Supplemental Table S4.** Telomere length (average of each sample) in relation to the oxidative stress variables (corresponding to the values of the previous day of the experiment). Factors in the final model have been highlighted in **bold**. Significant factors ( $p < 0.05$ ) have an \*. Random terms are included in all models, and their values are in *italic*.

|               | Fixed terms |           |                 |               |        | Random terms        |          |
|---------------|-------------|-----------|-----------------|---------------|--------|---------------------|----------|
|               | Terms       | Intercept | Estimate (S.E.) | F (d.f)       | p      | Terms               | Variance |
| Average       | AGE         | 8873      | -4.495 (3.64)   | 1.527 (46.34) | 0.223  | <i>Chick / Nest</i> | 106730   |
|               | Tocopherol  |           | -47.2 (32.63)   | 2.093 (47.13) | 0.155  | <i>Nest</i>         | 189285   |
|               | MDA         |           | 44.73 (31.71)   | 1.99 (48.03)  | 0.165  | <i>Gel</i>          | 228414   |
|               | TAC         |           | -4.73 (16.02)   | 0.087 (40.39) | 0.769  | <i>Residual</i>     | 15680    |
| Percentile 10 | AGE         | 6116      | -6.913 (2.621)  | 6.95 (47.54)  | 0.011* | <i>Chick / Nest</i> | 51368    |
|               | Tocopherol  |           | 0.34 (23.49)    | 0.001 (48.51) | 0.989  | <i>Nest</i>         | 68063    |
|               | MDA         |           | 15.48 (22.74)   | 0.464 (50.08) | 0.499  | <i>Gel</i>          | 75439    |
|               | TAC         |           | -11.97 (11.61)  | 1.062 (40.6)  | 0.309  | <i>Residual</i>     | 8267     |
| Percentile 20 | AGE         | 6858      | -5.547 (2.275)  | 5.945 (43.89) | 0.019* | <i>Chick / Nest</i> | 63002    |
|               | Tocopherol  |           | -16.52 (20.43)  | 0.654 (44.42) | 0.423  | <i>Nest</i>         | 88696    |
|               | MDA         |           | 20.45 (19.85)   | 1.062 (45.24) | 0.308  | <i>Gel</i>          | 77586    |
|               | TAC         |           | -8.38 (9.911)   | 0.715 (39.62) | 0.403  | <i>Residual</i>     | 5951     |
| Percentile 30 | AGE         | 7528      | -4.738 (2.437)  | 3.78 (43.54)  | 0.058  | <i>Chick / Nest</i> | 75492    |
|               | Tocopherol  |           | -30.69 (21.89)  | 1.97 (44.02)  | 0.168  | <i>Nest</i>         | 120653   |
|               | MDA         |           | 25.29 (21.29)   | 1.41 (44.67)  | 0.241  | <i>Gel</i>          | 94541    |
|               | TAC         |           | -5.249 (10.6)   | 0.245 (39.58) | 0.623  | <i>Residual</i>     | 6797     |
| Percentile 40 | AGE         | 8258      | -3.512 (3.031)  | 1.343 (44.69) | 0.253  | <i>Chick / Nest</i> | 93376    |
|               | Tocopherol  |           | -50.08 (27.21)  | 3.387 (45.28) | 0.072  | <i>Nest</i>         | 175525   |
|               | MDA         |           | 32.07 (26.48)   | 1.467 (45.92) | 0.232  | <i>Gel</i>          | 142318   |
|               | TAC         |           | -3.287 (13.25)  | 0.062 (39.98) | 0.805  | <i>Residual</i>     | 10658    |
| Percentile 50 | AGE         | 9147      | -2.507 (3.816)  | 0.432 (49.9)  | 0.515  | <i>Chick / Nest</i> | 121624   |
|               | Tocopherol  |           | -66.45 (34.24)  | 3.767 (46.62) | 0.058  | <i>Nest</i>         | 255819   |
|               | MDA         |           | 45.28 (33.32)   | 1.846 (47.26) | 0.181  | <i>Gel</i>          | 246389   |
|               | TAC         |           | 0.316 (16.76)   | 0.001 (40.39) | 0.985  | <i>Residual</i>     | 17136    |
| Percentile 60 | AGE         | 10247     | -2.012 (4.893)  | 0.169 (46.98) | 0.683  | <i>Chick / Nest</i> | 177420   |
|               | Tocopherol  |           | -77.91 (43.87)  | 3.153 (47.81) | 0.082  | <i>Nest</i>         | 358043   |
|               | MDA         |           | 64.16 (42.67)   | 2.26 (48.62)  | 0.139  | <i>Gel</i>          | 443578   |
|               | TAC         |           | 6.529 (21.59)   | 0.092 (40.77) | 0.764  | <i>Residual</i>     | 28524    |
| Percentile 70 | AGE         | 11565     | -0.477 (6.357)  | 0.006 (47.48) | 0.94   | <i>Chick / Nest</i> | 297541   |
|               | Tocopherol  |           | -102 (56.99)    | 3.194 (48.36) | 0.08   | <i>Nest</i>         | 510348   |
|               | MDA         |           | 84.96 (55.34)   | 2.357 (49.44) | 0.131  | <i>Gel</i>          | 737970   |
|               | TAC         |           | 18.34 (28.1)    | 0.426 (40.96) | 0.518  | <i>Residual</i>     | 48359    |
| Percentile 80 | AGE         | 13226     | 4.009 (8.546)   | 0.22 (47.04)  | 0.641  | <i>Chick / Nest</i> | 626268   |
|               | Tocopherol  |           | -149 (76.62)    | 3.77 (47.89)  | 0.058  | <i>Nest</i>         | 752358   |
|               | MDA         |           | 112 (74.2)      | 2.293 (49.38) | 0.136  | <i>Gel</i>          | 1069014  |
|               | TAC         |           | 28.56 (37.69)   | 0.574 (40.83) | 0.453  | <i>Residual</i>     | 86786    |
| Percentile 90 | AGE         | 15934     | 9.242 (13.17)   | 0.492 (46.62) | 0.486  | <i>Chick / Nest</i> | 1864367  |
|               | Tocopherol  |           | -217 (118)      | 3.382 (47.49) | 0.072  | <i>Nest</i>         | 1041406  |
|               | MDA         |           | 184 (114)       | 2.623 (49.99) | 0.111  | <i>Gel</i>          | 1370390  |
|               | TAC         |           | 35.72 (58.05)   | 0.379 (40.5)  | 0.542  | <i>Residual</i>     | 205278   |
