# Supplementary material
Source: PubMed Central journal article supplement (PMC7003462)

**Day 1**

Sample 1

1<sup>st</sup> dose

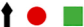

**Day 14**

Sample 2

2<sup>st</sup> dose

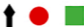

**Day 21**

Sample 3

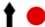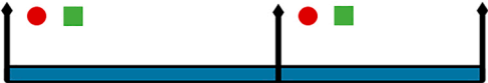

Supplement: rspb20191917supp1.pdf [file rspb20191917supp1.pdf]
